# Supplementary material for: Immunogenicity and reactogenicity of mRNA COVID-19 vaccine booster administered by intradermal or intramuscular route in Thai Older adults
Source: bioRxiv or medRxiv preprint supplement (doi:10.1101/2022.12.16.22283601), 2022-12-18

**Supplementary Figure S1.** Consort diagram of the study.

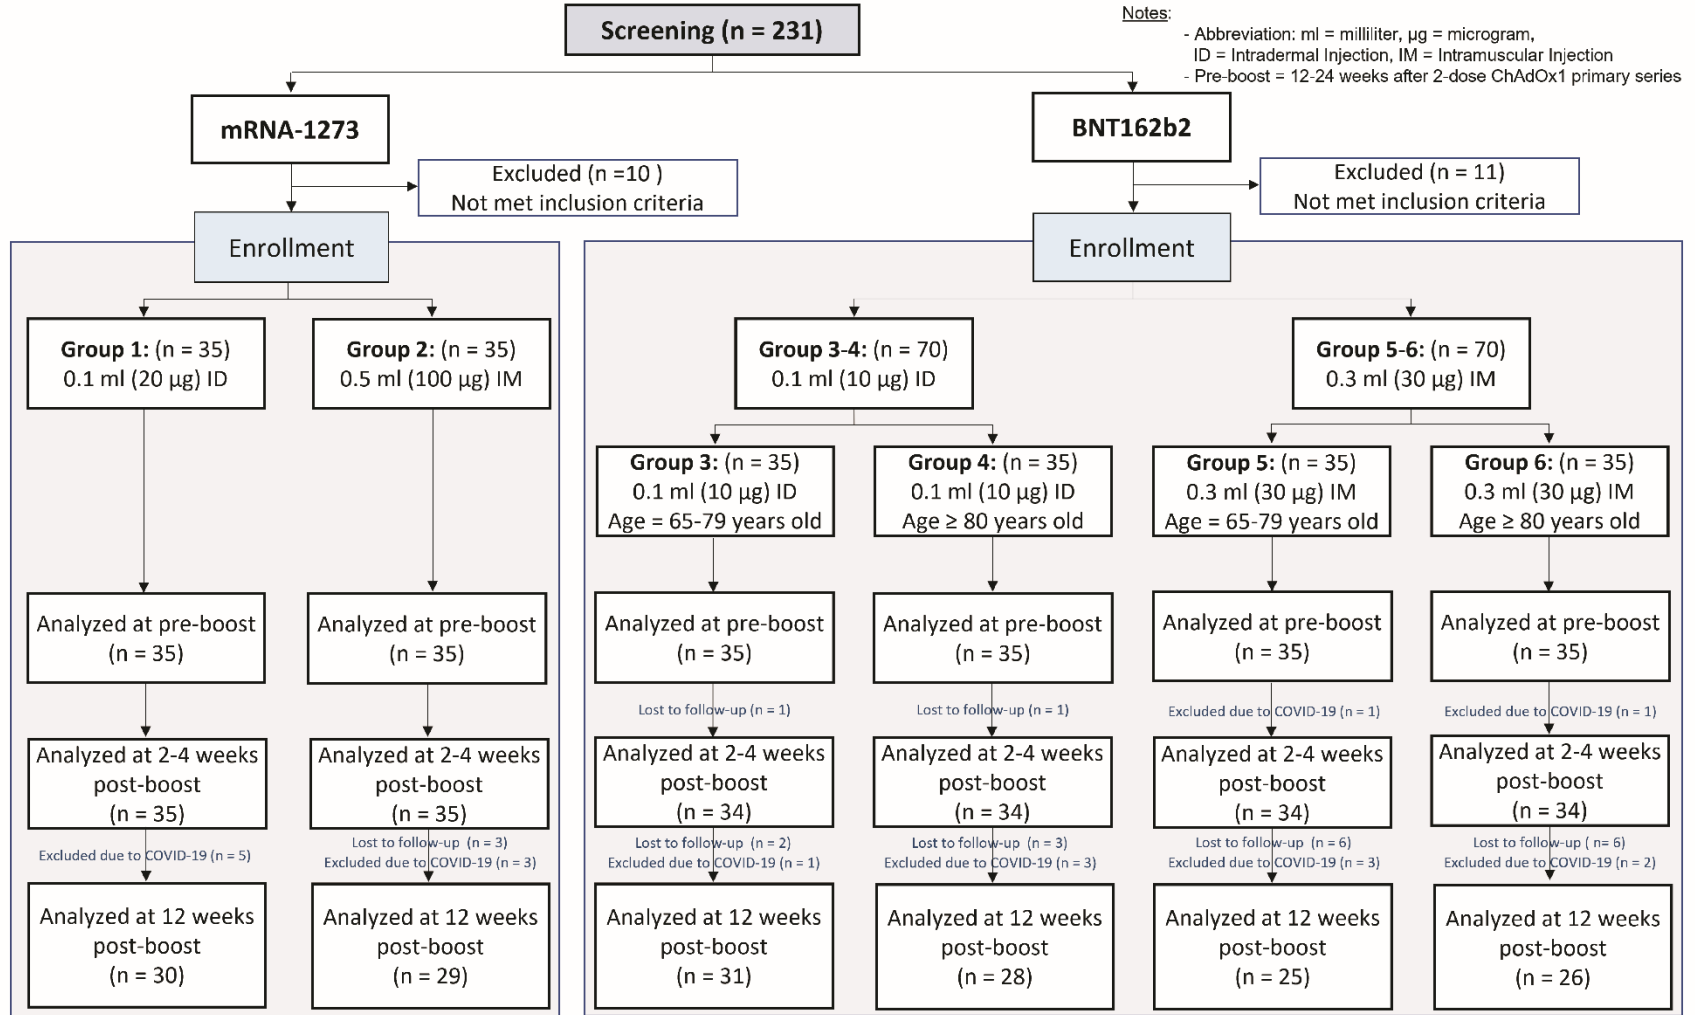

Supplement: Supplementary file [file media-9.pdf]
